# Supplementary material for: Systematics, biogeography, and character evolution of the legume tribe Fabeae with special focus on the middle-Atlantic island lineages
Source: PubMed Central journal article supplement (PMC3547781; doi:10.1186/1471-2148-12-250), 2012-12-25
Supplement: 1471-2148-12-250-S3.pdf [file 1471-2148-12-250-S3.pdf]

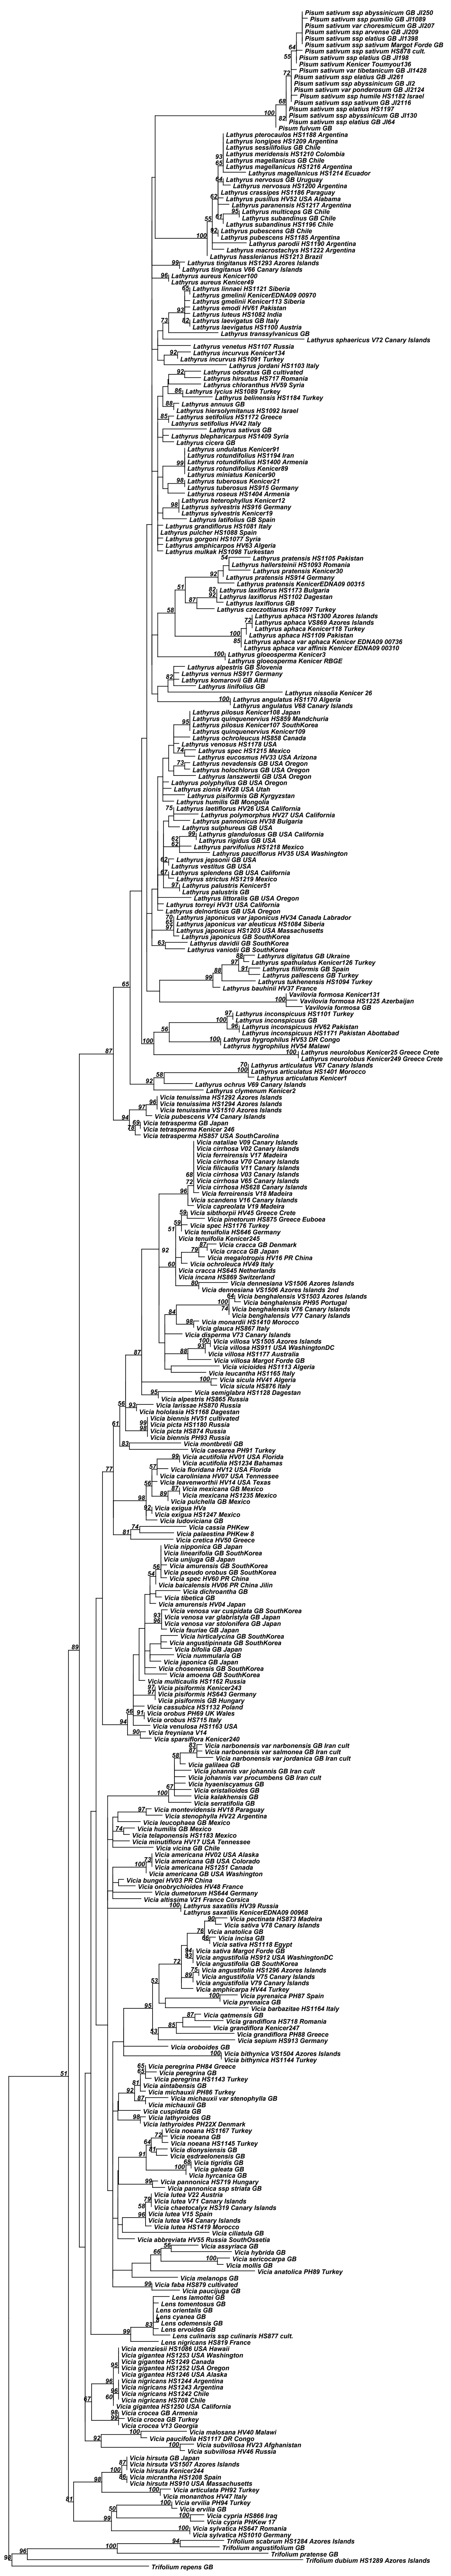

*Pisum sativum* ssp *abyssinicum* GB JI250  
*Pisum sativum* ssp *pumilio* GB JI1089  
*Pisum sativum* var *choresmicum* GB JI207  
*Pisum sativum* ssp *arvense* GB JI209  
*Pisum sativum* ssp *elatius* GB JI1398  
*Pisum sativum* ssp *sativum* Margot Forde GB  
*Pisum sativum* ssp *elatius* HS1197  
*Pisum sativum* Kenicer Toumyou136  
*Pisum sativum* var *tibeticum* GB JI1428  
*Pisum sativum* ssp *elatius* GB JI261  
*Pisum sativum* ssp *abyssinicum* GB JI2  
*Pisum sativum* var *ponderosum* GB JI2124  
*Pisum sativum* ssp *humile* HS1182 Israel  
*Pisum sativum* ssp *elatius* HS1197  
*Pisum sativum* ssp *abyssinicum* GB JI130  
*Pisum sativum* ssp *elatius* GB JI64  
*Pisum fulvum* GB

*Lathyrus pterocaulos* HS1188 Argentina  
*Lathyrus longipes* HS1209 Argentina  
*Lathyrus sessilifolius* GB Chile  
*Lathyrus meridensis* HS1210 Colombia  
*Lathyrus magellanicus* GB Chile  
*Lathyrus magellanicus* HS1216 Argentina  
*Lathyrus magellanicus* HS1214 Ecuador  
*Lathyrus nervosus* GB Uruguay  
*Lathyrus nervosus* HS1200 Argentina  
*Lathyrus crassipes* HS1186 Paraguay  
*Lathyrus pusillus* HV52 USA Alabama  
*Lathyrus paranensis* HS1217 Argentina  
*Lathyrus multiceps* GB Chile  
*Lathyrus subandinus* GB Chile  
*Lathyrus subandinus* HS1196 Chile  
*Lathyrus pubescens* HS1185 Argentina  
*Lathyrus parodi* HS1190 Argentina  
*Lathyrus macrostachys* HS1222 Argentina  
*Lathyrus hasslerianus* HS1213 Brazil  
*Lathyrus tingitanus* HS1293 Azores Islands  
*Lathyrus tingitanus* V66 Canary Islands  
*Lathyrus aureus* Kenicer100  
*Lathyrus linnaei* HS1121 Siberia  
*Lathyrus gmelinii* KenicerEDNA09 00970  
*Lathyrus gmelinii* Kenicer113 Siberia  
*Lathyrus emodi* HV61 Pakistan  
*Lathyrus luteus* HS1082 India  
*Lathyrus laevigatus* GB Italy  
*Lathyrus laevigatus* HS1100 Austria  
*Lathyrus transsilvanicus* GB  
*Lathyrus sphaericus* V72 Canary Islands

*Lathyrus venetus* HS1107 Russia  
*Lathyrus incurvus* Kenicer134  
*Lathyrus incurvus* HS1091 Turkey  
*Lathyrus jordani* HS1103 Italy  
*Lathyrus odoratus* GB cultivated  
*Lathyrus hirsutus* HS1171 Romania  
*Lathyrus chloranthus* HV59 Syria  
*Lathyrus lycius* HS1089 Turkey  
*Lathyrus belinensis* HS1184 Turkey  
*Lathyrus annuus* GB  
*Lathyrus hiersolymitanus* HS1092 Israel  
*Lathyrus setifolius* HS1172 Greece  
*Lathyrus setifolius* HV42 Italy  
*Lathyrus sativus* GB  
*Lathyrus blepharicarpus* HS1409 Syria  
*Lathyrus cicera* GB  
*Lathyrus undulatus* Kenicer91  
*Lathyrus rotundifolius* HS1194 Iran  
*Lathyrus rotundifolius* HS1400 Armenia  
*Lathyrus rotundifolius* Kenicer89  
*Lathyrus miniatus* Kenicer90  
*Lathyrus tuberosus* Kenicer21  
*Lathyrus tuberosus* HS915 Germany  
*Lathyrus roseus* HS1404 Armenia  
*Lathyrus heterophyllus* Kenicer12  
*Lathyrus sylvestris* HS916 Germany  
*Lathyrus sylvestris* Kenicer19  
*Lathyrus latifolius* GB Spain  
*Lathyrus grandiflorus* HS1081 Italy  
*Lathyrus pulcher* HS1088 Spain  
*Lathyrus gorgoni* HS1077 Syria  
*Lathyrus amphicarpos* HV63 Algeria  
*Lathyrus mulkai* HS1098 Turkey

*Lathyrus pratensis* HS1105 Pakistan  
*Lathyrus hallersteinii* HS1093 Romania  
*Lathyrus pratensis* Kenicer30  
*Lathyrus pratensis* HS914 Germany  
*Lathyrus pratensis* KenicerEDNA09 00315  
*Lathyrus laxiflorus* HS1173 Bulgaria  
*Lathyrus laxiflorus* HS1102 Dagestan  
*Lathyrus laxiflorus* GB  
*Lathyrus czechotianus* HS1097 Turkey  
*Lathyrus aphaca* HS1300 Azores Islands  
*Lathyrus aphaca* VS869 Azores Islands  
*Lathyrus aphaca* Kenicer118 Turkey  
*Lathyrus aphaca* HS1109 Pakistan  
*Lathyrus aphaca* var *aphaca* Kenicer EDNA09 00736  
*Lathyrus aphaca* var *affinis* Kenicer EDNA09 00310  
*Lathyrus gloeosperma* Kenicer3  
*Lathyrus gloeosperma* Kenicer RBGE  
*Lathyrus alpestris* GB Slovenia  
*Lathyrus vernus* HS917 Germany  
*Lathyrus komarovii* GB Altai  
*Lathyrus linifolius* GB  
*Lathyrus nissolia* Kenicer 26  
*Lathyrus angulatus* HS1170 Algeria  
*Lathyrus angulatus* V68 Canary Islands  
*Lathyrus pilosus* Kenicer108 Japan  
*Lathyrus quinquevius* HS859 Manchuria  
*Lathyrus pilosus* Kenicer107 SouthKorea  
*Lathyrus quinquevius* Kenicer109  
*Lathyrus ochroleucus* HS858 Canada  
*Lathyrus venosus* HS1178 USA  
*Lathyrus spec* HS1215 Mexico  
*Lathyrus eucosmus* HV33 USA Arizona  
*Lathyrus nevadensis* GB USA Oregon  
*Lathyrus holochlorus* GB USA Oregon  
*Lathyrus lanszwertii* GB USA Oregon  
*Lathyrus polyphyllus* GB USA Oregon  
*Lathyrus zionis* HV28 USA Utah  
*Lathyrus pisiformis* GB Kyrgyzstan  
*Lathyrus humilis* GB Mongolia  
*Lathyrus laetiflorus* HV26 USA California  
*Lathyrus polymorphus* HV27 USA California  
*Lathyrus panonicus* HS1100 Bulgaria  
*Lathyrus sulphureus* GB USA  
*Lathyrus glandulosus* GB USA California  
*Lathyrus rigidus* GB USA  
*Lathyrus parvifolius* HS1218 Mexico  
*Lathyrus pauciflorus* HV35 USA Washington  
*Lathyrus jepsonii* GB USA  
*Lathyrus vestitus* GB USA  
*Lathyrus splendens* GB USA California  
*Lathyrus strictus* HS1219 Mexico  
*Lathyrus palustris* Kenicer51  
*Lathyrus palustris* GB  
*Lathyrus littoralis* GB USA Oregon  
*Lathyrus torreyi* HV31 USA California  
*Lathyrus delnorticus* GB USA Oregon  
*Lathyrus japonicus* var *japonicus* HV34 Canada Labrador  
*Lathyrus japonicus* var *aleuticus* HS1084 Siberia  
*Lathyrus japonicus* HS1203 USA Massachusetts  
*Lathyrus japonicus* GB SouthKorea  
*Lathyrus davidii* GB SouthKorea  
*Lathyrus vaniotii* GB SouthKorea  
*Lathyrus digitatus* GB Ukraine  
*Lathyrus spatulatus* Kenicer126 Turkey  
*Lathyrus filiformis* GB Spain  
*Lathyrus pallescens* GB Turkey  
*Lathyrus tukhensis* HS1094 Turkey  
*Lathyrus bauhini* HV37 France  
*Vavilovia formosa* Kenicer131  
*Vavilovia formosa* HS1225 Azerbaijan  
*Vavilovia formosa* GB  
*Lathyrus inconspicuus* HS1101 Turkey  
*Lathyrus inconspicuus* GB  
*Lathyrus inconspicuus* HV62 Pakistan  
*Lathyrus inconspicuus* HS1171 Pakistan Abbottabad  
*Lathyrus hygrophilus* HV53 DR Congo  
*Lathyrus hygrophilus* HV54 Malawi  
*Lathyrus neurolobus* Kenicer25 Greece Crete  
*Lathyrus neurolobus* Kenicer249 Greece Crete  
*Lathyrus articulatus* V67 Canary Islands  
*Lathyrus articulatus* HS1401 Morocco  
*Lathyrus articulatus* Kenicer1

*Lathyrus ochrus* V69 Canary Islands  
*Lathyrus clymenum* Kenicer2  
*Vicia tenuissima* HS1292 Azores Islands  
*Vicia tenuissima* HS1294 Azores Islands  
*Vicia pubescens* V74 Canary Islands  
*Vicia tetrasperma* GB Japan  
*Vicia tetrasperma* Kenicer 246  
*Vicia tetrasperma* HS857 USA SouthCarolina  
*Vicia nataliae* V08 Canary Islands  
*Vicia cirrhosa* V02 Canary Islands  
*Vicia ferreirensis* V17 Madeira  
*Vicia cirrhosa* V70 Canary Islands  
*Vicia filicaulis* V11 Canary Islands  
*Vicia cirrhosa* V03 Canary Islands  
*Vicia cirrhosa* V65 Canary Islands  
*Vicia cirrhosa* HS628 Canary Islands  
*Vicia ferreirensis* V18 Madeira  
*Vicia scandens* V16 Canary Islands  
*Vicia capreolata* V19 Madeira  
*Vicia sibthorpii* HV45 Greece Crete  
*Vicia pinetorum* HS875 Greece Euboea  
*Vicia spec* HS1176 Turkey  
*Vicia tenuifolia* HS646 Germany  
*Vicia tenuifolia* Kenicer245  
*Vicia cracca* GB Denmark  
*Vicia cracca* GB Japan  
*Vicia megalotropis* HV16 PR China  
*Vicia ochroleuca* HV49 Italy  
*Vicia cracca* HS645 Netherlands  
*Vicia incana* HS869 Switzerland  
*Vicia dennesiana* VS1506 Azores Islands  
*Vicia dennesiana* VS1506 Azores Islands 2nd  
*Vicia benghalensis* VS1503 Azores Islands  
*Vicia benghalensis* PH95 Portugal  
*Vicia benghalensis* V76 Canary Islands  
*Vicia benghalensis* V77 Canary Islands  
*Vicia monardii* HS1410 Morocco  
*Vicia glauca* HS867 Italy  
*Vicia disperma* V73 Canary Islands  
*Vicia villosa* VS1505 Azores Islands  
*Vicia villosa* HS911 USA WashingtonDC  
*Vicia villosa* HS1177 Australia  
*Vicia villosa* Margot Forde GB  
*Vicia vicifolia* HS1113 Algeria  
*Vicia leucantha* HS1165 Italy  
*Vicia sicula* HV41 Algeria  
*Vicia sicula* HS876 Italy  
*Vicia semiglabra* HS1128 Dagestan  
*Vicia alpestris* HS865 Russia  
*Vicia larissae* HS870 Russia  
*Vicia hololasia* HS1188 Dagestan  
*Vicia biennis* HS1188 Dagestan  
*Vicia picta* HS1180 Russia  
*Vicia picta* HS874 Russia  
*Vicia biennis* PH93 Russia  
*Vicia montbretii* GB  
*Vicia caesarea* PH91 Turkey  
*Vicia acutifolia* HV01 USA Florida  
*Vicia acutifolia* HS1234 Bahamas  
*Vicia floridana* HV12 USA Florida  
*Vicia caroliniana* HV07 USA Tennessee  
*Vicia leavenworthii* HV14 USA Texas  
*Vicia mexicana* GB Mexico  
*Vicia pulchella* GB Mexico  
*Vicia exigua* HVa  
*Vicia ludoviciana* GB  
*Vicia cassia* PHKew  
*Vicia palestina* PHKew 8  
*Vicia cretica* HV50 Greece  
*Vicia nipponica* GB Japan  
*Vicia linearifolia* GB SouthKorea  
*Vicia unijuga* GB Japan  
*Vicia amurensis* GB SouthKorea  
*Vicia pseudo-orobus* GB SouthKorea  
*Vicia spec* HV60 PR China  
*Vicia baicalensis* HV06 PR China Jilin  
*Vicia dichroantha* GB  
*Vicia tibetica* GB  
*Vicia amurensis* HV04 Japan  
*Vicia venosa* var *cuspidata* GB SouthKorea  
*Vicia venosa* var *glabrifolia* GB Japan  
*Vicia venosa* var *stolonifera* GB Japan  
*Vicia fauriae* GB Japan  
*Vicia hirticalycina* GB SouthKorea  
*Vicia angustifolia* GB SouthKorea  
*Vicia bifolia* GB Japan  
*Vicia nummularia* GB  
*Vicia japonica* GB Japan  
*Vicia chosonenensis* GB SouthKorea  
*Vicia amoena* GB SouthKorea  
*Vicia multicaulis* HS1162 Russia  
*Vicia pisiformis* Kenicer43  
*Vicia pisiformis* HS643 Germany  
*Vicia pisiformis* GB Hungary  
*Vicia cassubica* HS1132 Poland  
*Vicia orobus* PH69 UK Wales  
*Vicia orobus* HS715 Italy  
*Vicia venulosa* HS1163 USA  
*Vicia freyniana* V14  
*Vicia sparsiflora* Kenicer240  
*Vicia narbonensis* var *narbonensis* GB Iran cult  
*Vicia narbonensis* var *salmonae* GB Iran cult  
*Vicia narbonensis* GB Iran cult  
*Vicia galliae* GB  
*Vicia johannis* var *johannis* var *iranica* GB Iran cult  
*Vicia johannis* var *procumbens* GB Iran cult  
*Vicia hyaeniscyamus* GB  
*Vicia eristalioides* GB  
*Vicia kalakensis* GB  
*Vicia serratifolia* GB  
*Vicia montevidensis* HV18 Paraguay  
*Vicia stenophylla* HV22 Argentina  
*Vicia leucophaea* GB Mexico  
*Vicia humilis* GB Mexico  
*Vicia telaponensis* HS1183 Tennessee  
*Vicia minutiflora* HV17 USA Tennessee  
*Vicia vicina* GB Chile  
*Vicia americana* HV02 USA Alaska  
*Vicia americana* GB USA Colorado  
*Vicia americana* HS1251 Canada  
*Vicia americana* GB USA Washington  
*Vicia bungei* HV03 PR China  
*Vicia onobrychioides* HV48 France  
*Vicia dumetorum* HS644 Germany  
*Vicia altissima* V21 France Corsica  
*Lathyrus saxatilis* KenicerEDNA09 00968  
*Lathyrus saxatilis* KenicerEDNA09 00968  
*Vicia pectinata* HS873 Madeira  
*Vicia sativa* V78 Canary Islands  
*Vicia sativa* GB  
*Vicia sativa* HS1118 Egypt  
*Vicia sativa* Margot Forde GB  
*Vicia angustifolia* HS912 USA WashingtonDC  
*Vicia angustifolia* GB SouthKorea  
*Vicia angustifolia* HS1296 Azores Islands  
*Vicia angustifolia* V75 Canary Islands  
*Vicia angustifolia* V75 Canary Islands  
*Vicia amphicarpa* HV44 Turkey  
*Vicia pyrenaica* PH87 Spain  
*Vicia pyrenaica* GB  
*Vicia barbatia* HS1164 Italy  
*Vicia qatmersis* Vicia grandiflora HS718 Romania  
*Vicia grandiflora* Kenicer247  
*Vicia grandiflora* PH88 Greece  
*Vicia sepium* HS913 Germany  
*Vicia oroboides* GB  
*Vicia bithynica* VS1504 Azores Islands  
*Vicia bithynica* HS1144 Turkey

*Vicia peregrina* PH84 Greece  
*Vicia peregrina* GB  
*Vicia aintabensis* GB  
*Vicia michauxii* PH86 Turkey  
*Vicia michauxii* var *stenophylla* GB  
*Vicia michauxii* GB  
*Vicia cuspidata* GB  
*Vicia lathyroides* GB  
*Vicia lathyroides* PH22X Denmark  
*Vicia noeana* HS1167 Turkey  
*Vicia noeana* HS1145 Turkey  
*Vicia dionysiensis* GB  
*Vicia esdraelonensis* GB  
*Vicia tigridis* GB  
*Vicia galeata* GB  
*Vicia hircanica* GB  
*Vicia panathica* HS119 Hungary  
*Vicia lutea* ssp *striata* GB  
*Vicia lutea* V22 Austria  
*Vicia lutea* V71 Canary Islands  
*Vicia chaetocalyx* HS319 Canary Islands  
*Vicia lutea* V15 Spain  
*Vicia lutea* V64 Canary Islands  
*Vicia lutea* HS1419 Morocco  
*Vicia eriophylla* GB  
*Vicia abbreviata* HV55 Russia SouthOssetia  
*Vicia assyriaca* GB  
*Vicia hybrida* GB  
*Vicia sericocarpa* GB  
*Vicia mollis* GB  
*Vicia melanops* GB  
*Vicia faba* HS879 cultivated  
*Vicia pinnatifida* GB  
*Lens tomentosa* GB  
*Lens orientalis* GB  
*Lens cyanea* GB  
*Lens odemensis* GB  
*Lens culinaris* ssp *culinaris* HS877 cult.  
*Lens culinaris* HS819 France  
*Vicia menziesii* HS1086 USA Hawaii  
*Vicia gigantea* HS1253 USA Washington  
*Vicia gigantea* HS1249 Canada  
*Vicia gigantea* HS1252 USA Oregon  
*Vicia gigantea* HS1246 USA Alaska  
*Vicia nigricans* HS1244 Argentina  
*Vicia nigricans* HS1243 Argentina  
*Vicia nigricans* HS1242 Chile  
*Vicia nigricans* HS708 Chile  
*Vicia nigricans* HS1250 USA California  
*Vicia crocea* GB Armenia  
*Vicia crocea* V73 Georgia  
*Vicia pauciflora* HS1117 DR Congo  
*Vicia subvillosa* HV46 Russia

*Vicia hirsuta* GB Japan  
*Vicia hirsuta* VS1507 Azores Islands  
*Vicia hirsuta* Kenicer244  
*Vicia micrantha* HS1208 Spain  
*Vicia articulata* PH92 Turkey  
*Vicia ervilla* PH94 Turkey  
*Vicia ervilla* GB  
*Vicia cyprica* HS866 Iraq  
*Vicia cyprica* PHKew 17  
*Vicia sylvatica* HS647 Romania  
*Vicia sylvatica* HS1010 Germany  
*Trifolium scabrum* HS1284 Azores Islands  
*Trifolium angustifolium* GB  
*Trifolium repens* GB  
*Trifolium dubium* HS1289 Azores Islands

*Trifolium repens* GB  
*Trifolium dubium* HS1289 Azores Islands
