# Supplementary material for: Systematics, biogeography, and character evolution of the legume tribe Fabeae with special focus on the middle-Atlantic island lineages
Source: PubMed Central journal article supplement (PMC3547781; doi:10.1186/1471-2148-12-250), 2012-12-25

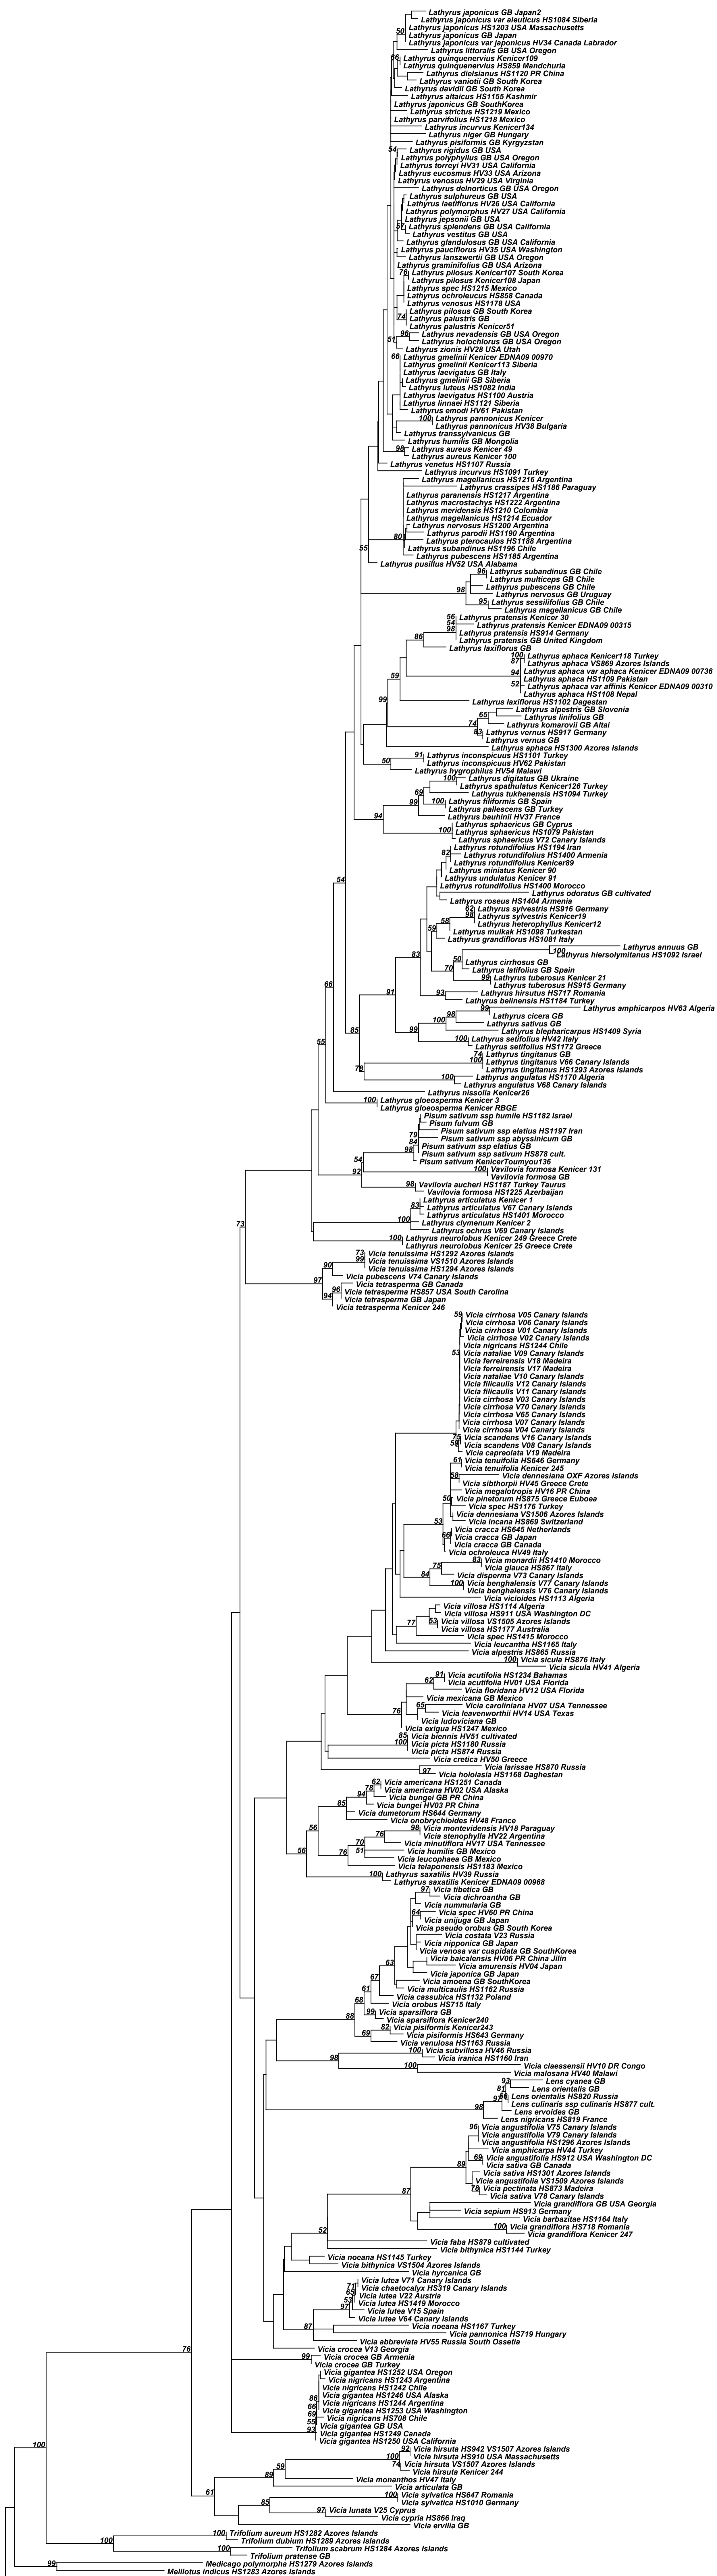

Supplement: 1471-2148-12-250-S9.pdf [file 1471-2148-12-250-S9.pdf]
